# Supplementary material for: Gait analysis reveals new outcome measures for monitoring disease progression in individuals with late-onset Pompe disease
Source: Research Square preprint supplement (doi:10.21203/rs.3.rs-7118240/v1), 2025-07-23
Supplement: Supplementary file 2 [file 5e2b6c2223996c1af803a9be.xlsx]

## Sheet: Sheet1
		Grouped by Cluster
		Missing	Cluster 1	Cluster 2	P-Value
n			12	31
AGE, mean (SD)		0	40.5 (17.1)	59.8 (12.2)	0.003
SEX, n (%)	FEMALE	0	4 (33.3)	16 (51.6)	0.461
	MALE		8 (66.7)	15 (48.4)
ERT, n (%)	Yes	0	12 (100.0)	29 (93.5)	1.000
	No			2 (6.5)
VELOCITY, mean (SD)		0	1.6 (0.2)	1.1 (0.2)	<0.001
CADENCE, mean (SD)		0	58.3 (6.6)	51.5 (2.9)	0.004
STRIDE LENGTH NORM, mean (SD)		0	0.9 (0.1)	0.7 (0.1)	<0.001
DOUBLE SUPPORT, mean (SD)		1	23.8 (4.3)	29.3 (4.7)	0.002
STANCE TIME, mean (SD)		0	62.2 (2.0)	64.7 (2.3)	0.002
6MWD, mean (SD)		0	561.2 (59.9)	389.6 (80.2)	<0.001
GPS Right, mean (SD)		4	4.5 (0.4)	5.0 (1.2)	0.053
