# Supplementary material for: Gait analysis reveals new outcome measures for monitoring disease progression in individuals with late-onset Pompe disease
Source: Research Square preprint supplement (doi:10.21203/rs.3.rs-7118240/v1), 2025-07-23
Supplement: Supplementary file 3 [file b27752e7b00f738476460404.xlsx]

## Sheet: Sheet1
		Grouped by PATHOLOGY
		Missing	CTL	POMPE	P-Value
n			60	43
AGE, mean (SD)		0	52.5 (14.4)	54.4 (16.1)	0.542
SEX, n (%)	FEMALE	0	36 (60.0)	20 (46.5)	0.248
	MALE		24 (40.0)	23 (53.5)
ERT, n (%)	No	60		2 (4.7)	1.000
	Yes			41 (95.3)
VELOCITY, mean (SD)		0	1.3 (0.2)	1.2 (0.3)	0.083
CADENCE, mean (SD)		0	59.4 (7.3)	53.4 (5.2)	<0.001
STRIDE LENGTH NORM, mean (SD)		0	1.3 (0.2)	1.4 (0.3)	0.536
DOUBLE SUPPORT, mean (SD)		2	25.5 (6.0)	27.7 (5.2)	0.048
STANCE TIME, mean (SD)		1	62.7 (2.2)	64.0 (2.5)	0.006
6MWD, mean (SD)		4	3.6 (1.0)	4.8 (1.0)	<0.001
GPS Right, mean (SD)		3	632.6 (95.3)	437.5 (107.7)	<0.001
RETEST, n (%)	0	0	39 (65.0)	24 (55.8)	0.416
	1		14 (23.3)	14 (32.6)
	2		5 (8.3)	5 (11.6)
	3		2 (3.3)
